# Supplementary material for: Characterization and Functional Analysis of Chalcone Synthase Genes in Highbush Blueberry (Vaccinium corymbosum)
Source: MDPI journal article supplement (doi:10.3390/ijms241813882), 2023-09-09
Supplement: s1 [file s1]

**Table S1** Information for the primers used in this study.

| Primer Name                | Forward Primer                                 | Reverse Primer                                      | Applications        |
|----------------------------|------------------------------------------------|-----------------------------------------------------|---------------------|
| VcCHS8                     | ATGGTCACCGTCGAGGAA                             | TCAAGTGCACAAGCTGTGG                                 | Vector construction |
| VcCHS8-OE                  | ACGGGGGACTCTAGAGGATCCATGGTCACCGTCGAGGAA        | GCTCACCATCGCTGCACTAGTTCAAGTGCACAAGCTGTGG            |                     |
| VcCHS13                    | ATGGCTCCTACAGGTGTGT                            | TCAGTGAGTCACACCGC                                   |                     |
| VcCHS13-OE                 | ACGGGGGACTCTAGAGGATCCATGGCTCCTACAGGTGTGT       | GCTCACCATCGCTGCACTAGTTCAGTGAGTCACACCGC              |                     |
| VcCHS21                    | ATGGTGACCGTCGAGGAA                             | CTAAGTGCACAGACTATGGAGC                              |                     |
| VcCHS21-OE                 | ACGGGGGACTCTAGAGGATCCATGGTGACCGTCGAGGAA        | GCTCACCATCGCTGCACTAGTCTAAGTGCACAGACTATGGAGC         |                     |
| VcCHS21 <sub>306</sub>     | TATTTTGTCTAGTAATAATATGAGT                      | AGAAATAAAAAATAAAAAATTTAAATTTGG                      |                     |
| VcCHS21 <sub>306</sub> -Ai | AATTCGAGCTCGGTACCCGGGTATTTTGTCTAGTAATAATATGAGT | ATACAGAGCACATGCCTCGAGAGAAATAAAAAATAAAAAATTTAAATTTGG |                     |
| VcCHS21 <sub>129</sub>     | AGTTGAAACTCAGCTTG                              | TTTGACATCTCTCTTTAATC                                |                     |
| VcCHS21 <sub>129</sub> -Ai | AATTCGAGCTCGGTACCCGGGAGTTGAAACTCAGCTTG         | ATACAGAGCACATGCCTCGAGTTTGACATCTCTCTTTAATC           |                     |
| VcAN1                      | GCAACCCTCTCTCTTTCACT                           | CCATTTTCATTACCGCAAGC                                |                     |
| VcAN1-AD                   | GCCATGGAGGCCAGTGAATTCGCAACCCTCTCTCTTTCACT      | CAGCTCGAGCTCGATGGATCCCCATTTTCATTACCGCAAGC           |                     |
| VcbHLH42-1                 | GCAACCCTCTCTCTTTCACT                           | CCATTTTCATTACCGCAAGC                                |                     |
| VcbHLH42-1-AD              | GCCATGGAGGCCAGTGAATTCGCAACCCTCTCTCTTTCACT      | CAGCTCGAGCTCGATGGATCCCCATTTTCATTACCGCAAGC           |                     |
| VcbHLH1-1                  | GCACAGAATCAATGGCTTC                            | CGTGTTTGTGGTTTGGC                                   |                     |
| VcbHLH1-1-AD               | GCCATGGAGGCCAGTGAATTCGCACAGAATCAATGGCTTC       | CAGCTCGAGCTCGATGGATCCCGTGTTTGTGGTTTGGC              |                     |
| VcbHLH1-2                  | TTCCCTTACCCATCTTCCT                            | CTGTGTTTGTGGTTTGGC                                  |                     |
| VcbHLH1-2-AD               | GCCATGGAGGCCAGTGAATTC TTCCCTTACCCATCTTCCT      | CAGCTCGAGCTCGATGGATCCCTGTGTTTGTGGTTTGGC             |                     |
| GAPDH                      | GCTCCCAGCAAGGATGCCCC                           | CGGAAGGCCATTCCAGTCAACT                              |                     |
| qVcCHS8                    | TCGGGTTCTAGTCGTTTGCT                           | ATGGCTTCTCAACTTCGGGA                                | qRT-PCR             |
| qVcCHS13                   | CCTCGTTGTTTGCTCCGAAA                           | AGACGAGTTGGAAGAGTGGG                                |                     |
| qVcCHS21                   | CGCATGTGTGACAAATCCCA                           | ACCATATCCTGCCTAGCGTC                                |                     |
| qVcCHI                     | TCTTTCCTCCGTCGGTCAAA                           | ACTCTACGGCGCTAACTTGT                                |                     |
| qVcDFR                     | GCTTCTTGAACGGGGCTATG                           | CTCAATGGCCTCGTCGAAG                                 |                     |

|         |                           |                          |
|---------|---------------------------|--------------------------|
| qVcF3H  | GTGGACGGAGCTTTTGTGT       | GTGATTGGCTCGTCGAGAAC     |
| qVcANS  | ACCTGAGAGCCCTAACAACC      | CTGTGATCCATTTGCCCTCG     |
| qVcUFGT | ATTGGTGTGAGAGTGGAGGG      | GTCCAACAGCCTTCAAAGCA     |
| Actin   | TGACCGAATGAGCAAGGAAATTACT | TACTCAGCTTTGGCAATCCACATC |
| qMdCHS  | GGAGACAACTGGAGAAGGACTGGAA | CGACATTGATACTGGTGTCTTCA  |
| qMdDFR  | GATAGGGTTTGAGTTCAAGTA     | TCTCCTCAGCAGCCTCAGTTTCT  |
| qMdANS  | GAGAAGTATGCCAATGACCAGG    | GGCGGTTGCCTCAATGTAAT     |
| qMdUFGT | CCACCGCCCTTCCAAACACTCT    | CACCCTTATGTTACGCGGCATGT  |

---
